# Supplementary material for: Continuous aerosol size separator using inertial microfluidics and its application to airborne bacteria and viruses
Source: Royal Society of Chemistry journal article supplement (doi:10.1039/c5lc00079c), 2015-01-01
Supplement: c5lc00079c1.pdf [file c5lc00079c1.pdf]

## Supplemental Information

# Continuous aerosol size separator using inertial microfluidics and its application to airborne bacteria and viruses

Seung Chan Hong<sup>1†</sup>, Joon Sang Kang<sup>2†</sup>, Jung Eun Lee<sup>3</sup>, Sang Soo Kim<sup>1\*</sup> and Jae Hee Jung<sup>2\*</sup>

*<sup>1</sup>Department of Mechanical Engineering, Korea Advanced Institute of Science and Technology, Daehak-ro 291, Yuseong-gu, Daejeon 305-701, Republic of Korea*

*<sup>2</sup>Center for Environment, Health and Welfare Research, Department of Energy and Environmental Engineering, Korea University of Science and Technology (UST), Korea Institute of Science and Technology (KIST), Hwarang-ro 14-gil 5 Seongbuk-gu, Seoul 136-791, Republic of Korea*

*<sup>3</sup>Han-River Environment Research Center, National Institute of Environmental Research (NIER), Yangseo-myeon, Yangpyeong-gun, Gyeonggi-do 476-823, Republic of Korea*

---

<sup>†</sup>Authors equally contributed to this work.

\* Authors to whom correspondence should be addressed.

e-mail) [sskim@kaist.ac.kr](mailto:sskim@kaist.ac.kr)

e-mail) [jaehee@kist.re.kr](mailto:jaehee@kist.re.kr)

**Figure S-1.** The separator was fabricated using a conventional soft lithography process.<sup>1</sup> (a) A 100- $\mu\text{m}$  layer of SU-8 negative photoresist was spin-coated onto a Si wafer substrate. (b) The wafer was then patterned via UV exposure. (c) The patterned wafer was developed using SU-8 developer then washed with IPA and SDW. (d) PDMS was poured over the developed wafer. (e) The patterned PDMS was then removed from the wafer and bonded to a slide glass using an  $\text{O}_2$  plasma to seal the microchannel.

**Figure S-2.** (a), (b) and (c) show fluorescence micrographs of *S. epidermidis* sampled at each of the separator's outlet. *S. epidermidis* was sampled using polytetrafluoroethylene (PTFE) filters (SKC Inc., Covington, GA),<sup>2</sup> that were placed in a button aerosol sampler (SKC Inc.) with a sampling time of 5 min. The collected bacteria were dissolved in 1 mL of SDW and sonicated in a sonication bath for 10 min to ensure their removal from the filters. The collected bacterial suspensions were dyed with SYBR green I (Life Technologies, USA) to distinguish biological and non-biological particles.<sup>3,4</sup> The micrographs show higher fluorescence intensity at the second outlet, indicating that most of the bacteria were ejected from the second outlet (red and blue pixels are defective).

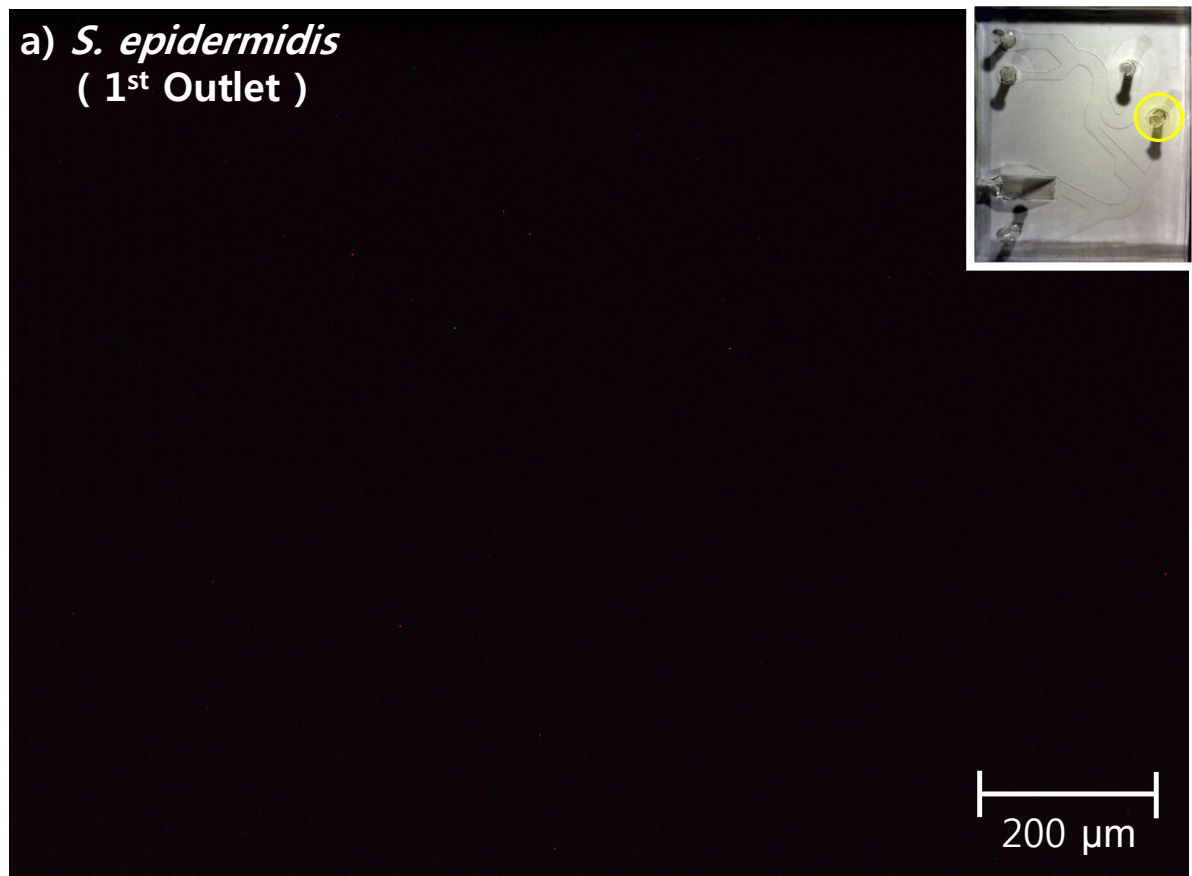

b) *S. epidermidis*  
( 2<sup>nd</sup> Outlet )

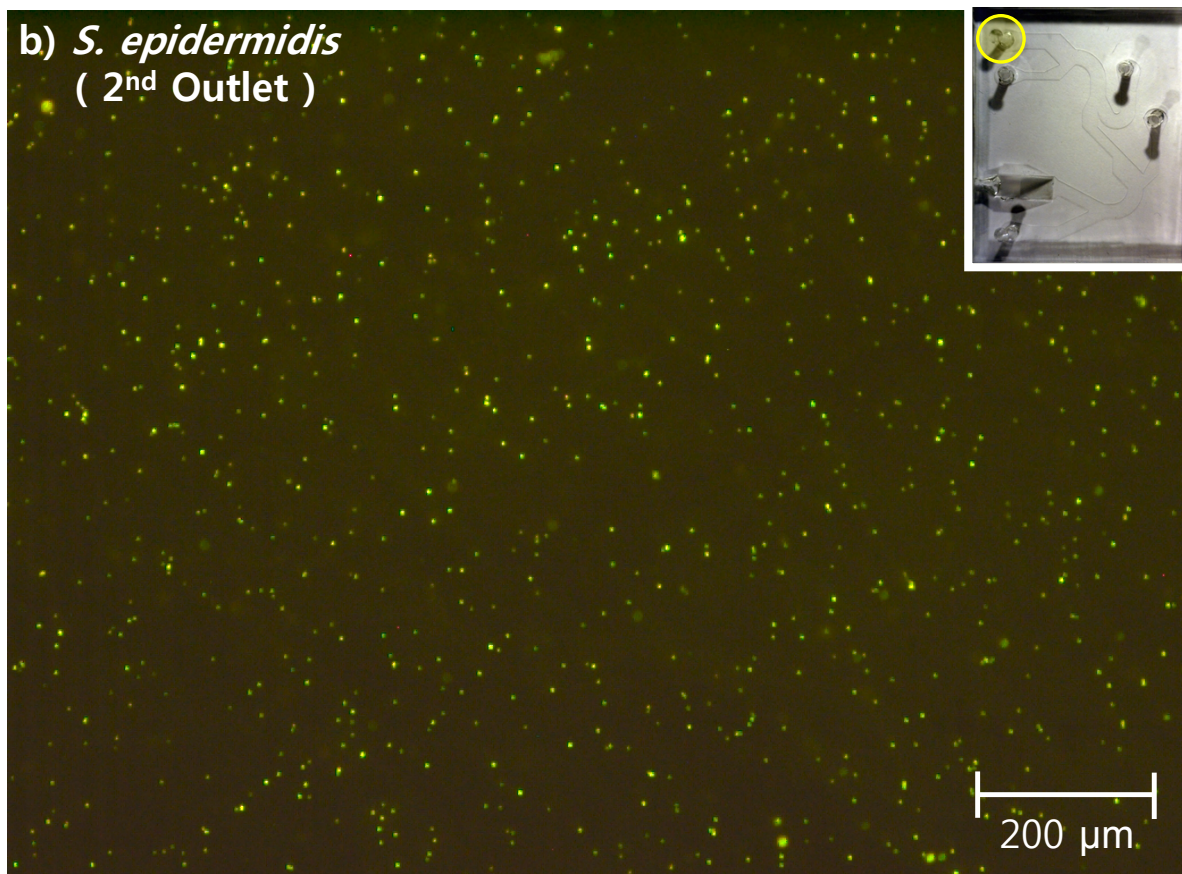

c) *S. epidermidis*  
( 3<sup>rd</sup> Outlet )

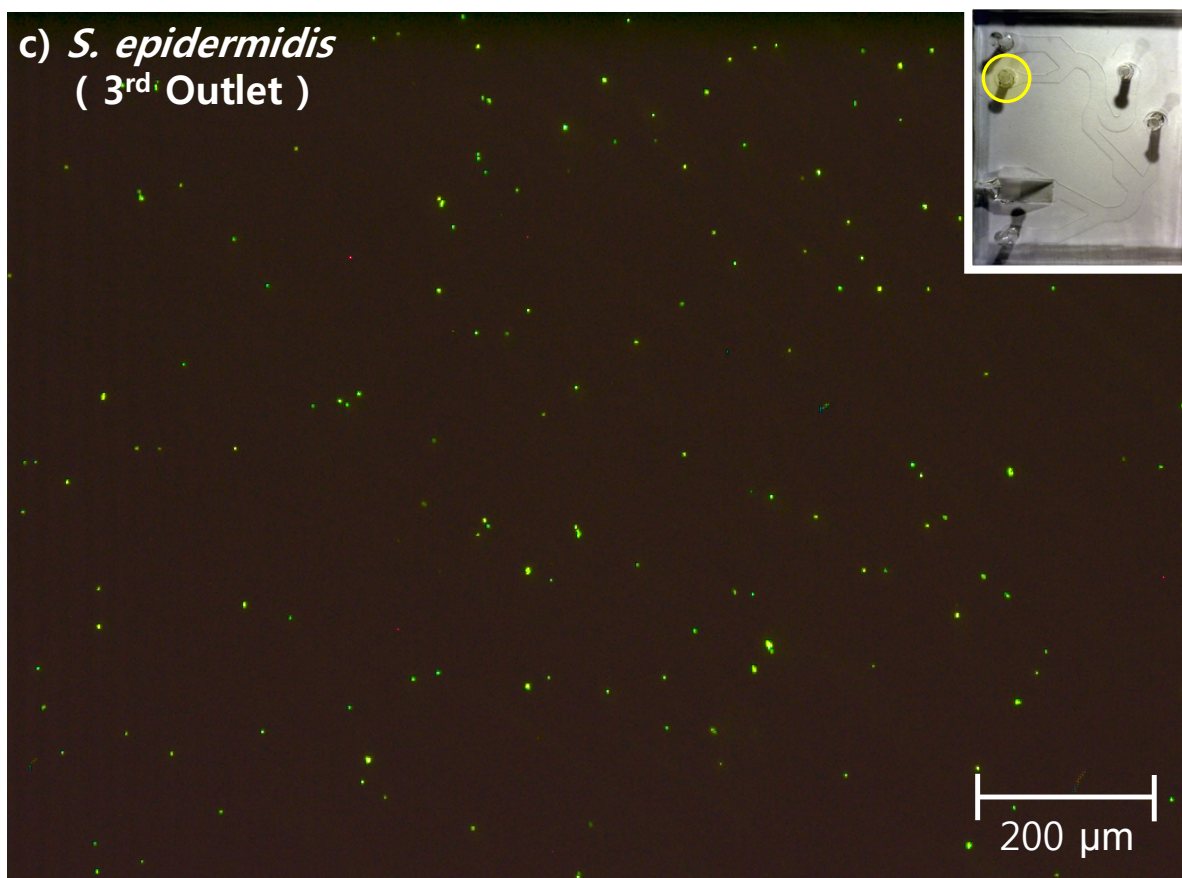



**Figure S-3.** (a), (b) and (c) show fluorescence micrographs of Adenovirus sampled at each of the separator's outlet. Adenovirus was sampled using polytetrafluoroethylene (PTFE) filters (SKC Inc., Covington, GA),<sup>2</sup> that were placed in a button aerosol sampler (SKC Inc.) with a sampling time of 10 min. The collected viruses were dissolved in 1 mL of SDW and sonicated in a sonication bath for 10 min to ensure their removal from the filters. The collected viral suspensions were dyed with SYBR green I (Life Technologies, USA) to distinguish biological and non-biological particles.<sup>3,4</sup> The micrographs show higher fluorescence intensity at the third outlet, indicating that most of the viruses were ejected from the third outlet (red and blue pixels are defective).

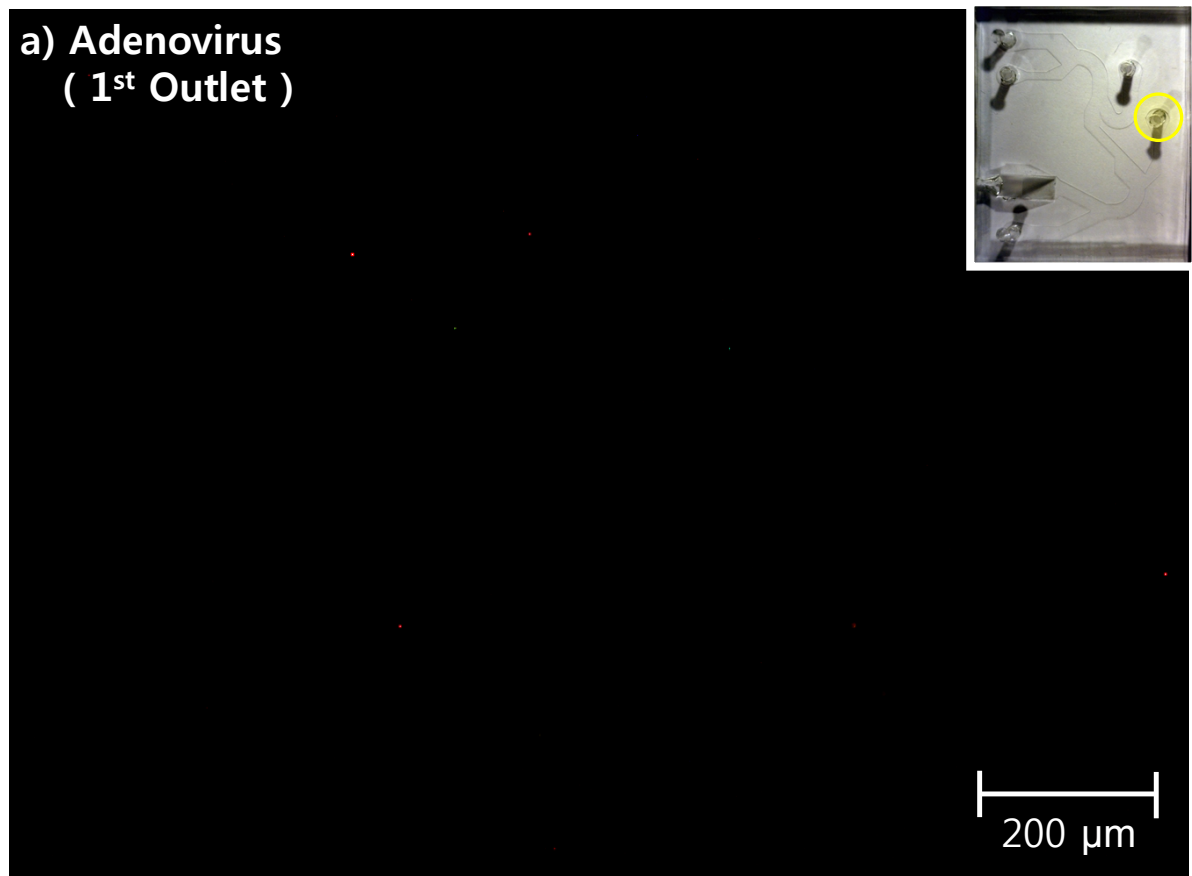

**b) Adenovirus**  
**( 2<sup>nd</sup> Outlet )**

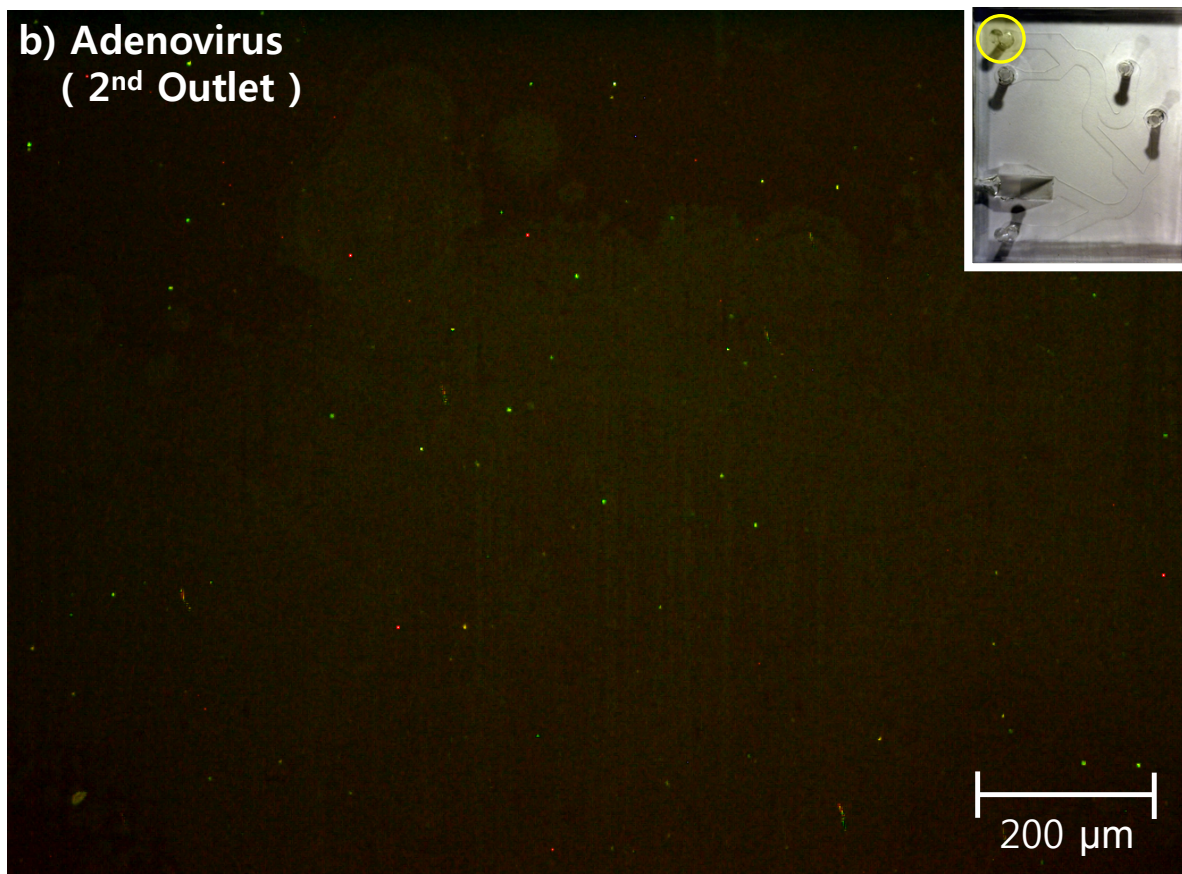

**c) Adenovirus**  
**( 3<sup>rd</sup> Outlet )**

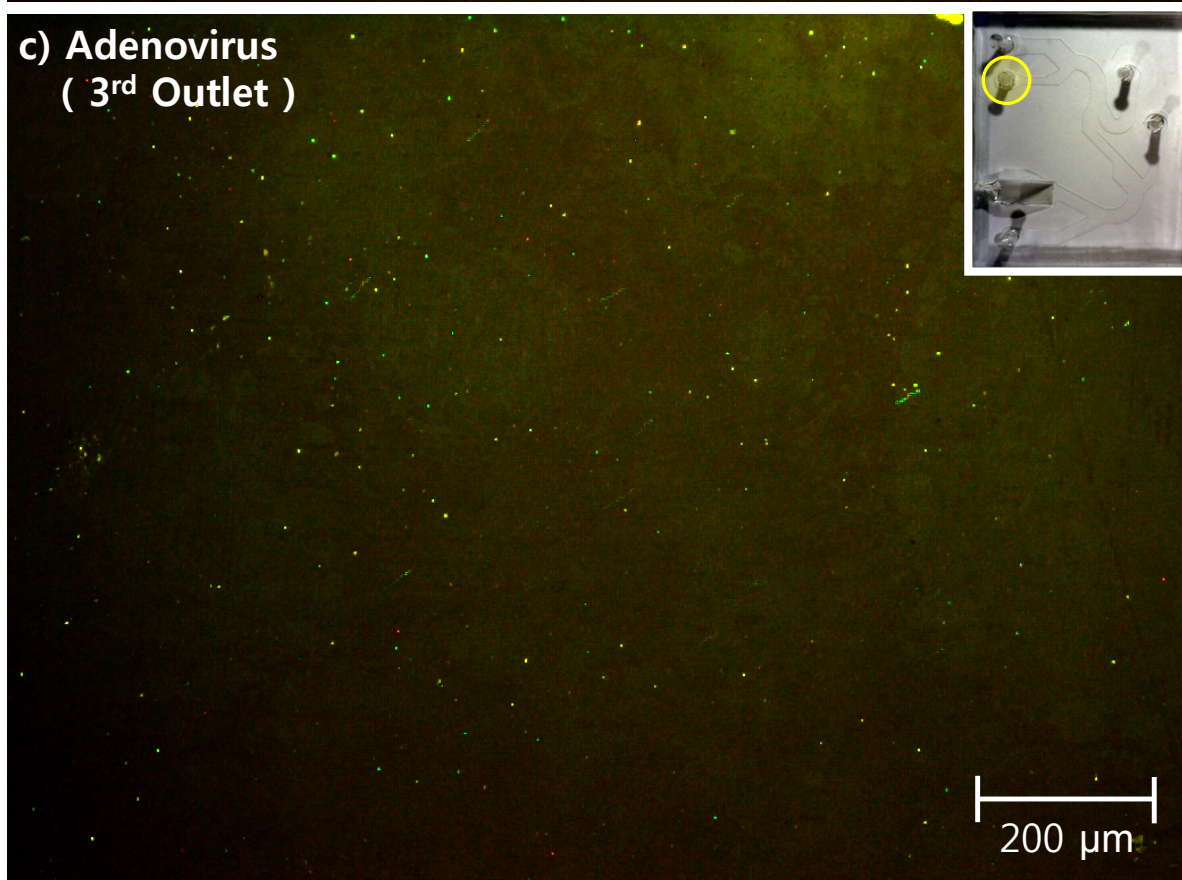

## References

- <sup>1</sup> D. Qin, Y. Xia and G. M. Whitesides, *Nat. Protocs.*, 2010, **5**, 491–502.
- <sup>2</sup> N. C. Burton, S. A. Grinshpun and T. Reponen, *Ann. Occup. Hyg.*, 2007, **51**, 143–151.
- <sup>3</sup> D. Lee, S. H. Park, H. Yang, K. Chung, T. H. Yoon, S. Kim, K. Kim, and Y. T. Kim, *Lab Chip*, 2004, **4**, 401–407.
- <sup>4</sup> R. T. Noble and J. A. Fuhrman, *Aquat. Microb. Ecol.*, 1998, **14**, 113–118.
